# Supplementary material for: A high-temperature molecular ferroelastic phase transition and switchable dielectric response in the trimethylbromomethylammonium salt [C4H11NBr] [PF6]
Source: Royal Society of Chemistry journal article supplement (doi:10.1039/c8nj02645a), 2018-01-01
Supplement: c8nj02645a1.pdf [file c8nj02645a1.pdf]

## Supporting Information

High-temperature molecular ferroelastic phase transition and switchable dielectric response in  
the trimethylbromomethylammonium salt  $[\text{C}_4\text{H}_{11}\text{NBr}] [\text{PF}_6]$

*Xiao-Gang Chen, Ji-Xing Gao, Xiu-Ni Hua, Wei-Qiang Liao\**

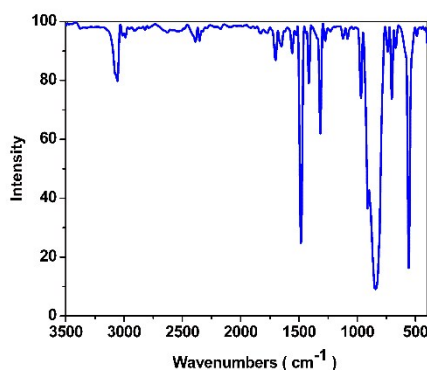

Figure S1. Infrared (IR) spectra of solid **1** in KBr pellet recorded on a Shimadzu model IR-60 spectrometer at room temperature.

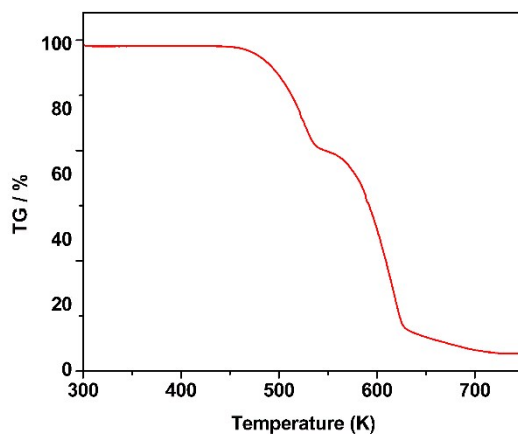

Figure S2. Thermal analysis for **1**, revealing the good thermal stability up to 450 K.

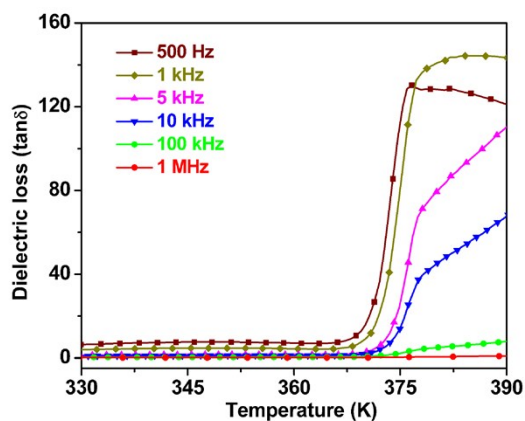

Figure S3. The temperature-dependence of dielectric loss ( $\tan\delta$ ) of **1** measured at selected frequencies (500 Hz-1 MHz).

**Table S1** Selected geometric parameters ( $\text{\AA}$ ,  $^\circ$ )

|           |            |          |           |
|-----------|------------|----------|-----------|
| Br1—C1    | 1.927 (8)  | F2—P1    | 1.564 (6) |
| C1—N1     | 1.463 (9)  | F3—P1    | 1.568 (6) |
| C2—N1     | 1.486 (10) | F4—P1    | 1.572 (5) |
| C3—N1     | 1.502 (9)  | F5—P1    | 1.566 (6) |
| C4—N1     | 1.504 (9)  | F6—P1    | 1.564 (6) |
| F1—P1     | 1.551 (6)  |          |           |
| N1—C1—Br1 | 112.8 (5)  | F2—P1—F5 | 178.5 (4) |
| C1—N1—C2  | 106.7 (6)  | F6—P1—F5 | 92.7 (4)  |
| C1—N1—C3  | 110.2 (6)  | F1—P1—F3 | 88.9 (4)  |
| C2—N1—C3  | 111.0 (6)  | F2—P1—F3 | 91.5 (4)  |
| C1—N1—C4  | 111.5 (6)  | F6—P1—F3 | 178.1 (4) |
| C2—N1—C4  | 108.7 (7)  | F5—P1—F3 | 87.6 (4)  |
| C3—N1—C4  | 108.7 (6)  | F1—P1—F4 | 178.6 (4) |
| F1—P1—F2  | 88.9 (4)   | F2—P1—F4 | 90.9 (4)  |
| F1—P1—F6  | 93.0 (4)   | F6—P1—F4 | 88.4 (4)  |
| F2—P1—F6  | 88.2 (4)   | F5—P1—F4 | 88.0 (4)  |
| F1—P1—F5  | 92.2 (4)   | F3—P1—F4 | 89.7 (4)  |

**Table S2** Summary of the analysis of the phase transition on TMHMA-based compounds

| Compound                       | T <sub>c</sub> /K | ordered-disordered part for phase transition |
|--------------------------------|-------------------|----------------------------------------------|
| [TMCM-MnCl <sub>3</sub> ]      | 406               | [TMCM] cations                               |
| [TMCM-CdCl <sub>3</sub> ]      | 400               | [TMCM] cations                               |
| [TMBM-MnBr <sub>3</sub> ]      | 415               | [TMBM] cations                               |
| <b>[TMBMA][PF<sub>6</sub>]</b> | <b>380</b>        |                                              |
